# Supplementary material for: Stage-stratified molecular profiling of non-muscle-invasive bladder cancer enhances biological, clinical, and therapeutic insight
Source: PubMed Central journal article supplement — Cell Rep Med. 2021 Dec 21;2(12):100472. doi: 10.1016/j.xcrm.2021.100472 (PMC8714941; doi:10.1016/j.xcrm.2021.100472), 2021-12-21
Supplement: mmc1.pdf [file mmc1.pdf]

**Cell Reports Medicine, Volume 2**

**Supplemental information**

**Stage-stratified molecular profiling  
of non-muscle-invasive bladder cancer enhances  
biological, clinical, and therapeutic insight**

**Carolyn D. Hurst, Guo Cheng, Fiona M. Platt, Mauro A.A. Castro, Nour-al-dain S. Marzouka, Pontus Eriksson, Emma V.I. Black, Olivia Alder, Andrew R.J. Lawson, Sia V. Lindskrog, Julie E. Burns, Sunjay Jain, Jo-An Roulson, Joanne C. Brown, Jan Koster, A. Gordon Robertson, Inigo Martincorena, Lars Dyrskjöt, Mattias Höglund, and Margaret A. Knowles**

**Table S2. Genes selected for targeted sequencing. Related to Figures 1-3.**

|          |         |           |          |
|----------|---------|-----------|----------|
| ACAN     | EGFR    | LARP1B    | RAD21    |
| AHNAK2   | ELF3    | LGALS8    | RARG     |
| AKT1     | EP300   | LPHN3     | RB1      |
| ARHGAP18 | EPG5    | LRRC7     | RBM10    |
| ARHGEF10 | ERBB2   | MAGI3     | RBM6     |
| ARHGEF3  | ERBB3   | MAML1     | RHOA     |
| ARID1A   | ERCC2   | MAPK8IP3  | RHOB     |
| ARID2    | ESPL1   | MECOM     | RREB1    |
| ARID4A   | FANCA   | MYCBP2    | RXRA     |
| ASH1L    | FAT1    | MYO5B     | RYR2     |
| ASXL2    | FAT2    | NAT10     | SCN1A    |
| ATM      | FAT3    | NCOR1     | SLC25A48 |
| ATP6V1B2 | FAT4    | NCSTN     | SPTAN1   |
| ATP7B    | FBXW7   | NF1       | STAG1    |
| B3GNT9   | FGFR3   | NFE2L2    | STAG2    |
| BRAF     | FMN1    | NFE2L3    | STK38    |
| BRCA2    | FOXA1   | NOTCH1    | SYNE1    |
| BTG2     | FOXQ1   | NOTCH2    | SYNE2    |
| C1ORF173 | FREM2   | NOTCH3    | TET3     |
| CACNA1D  | HAUS6   | NRAS      | TEX15    |
| CCND1    | HEPACAM | OSMR      | TNC      |
| CCND3    | HERC1   | PAIP1     | TP53     |
| CDKN1A   | HMCN1   | PALM3     | TRAK1    |
| CDKN2A   | HRAS    | PCDHA9    | TSC1     |
| CDKN2B   | HRNR    | PDZD2     | TSC2     |
| CEP290   | INADL   | PGS1      | TXNIP    |
| CHD6     | ITK     | PHF3      | UEVLD    |
| CLTC     | KDM3A   | PIK3CA    | USP47    |
| CLU      | KDM6A   | PIK3R1    | UTY      |
| COL11A1  | KIF16B  | PIK3R4    | VCAN     |
| CPAMD8   | KLF5    | POLE      | WHSC1L1  |
| CREBBP   | KMT2A   | POLE2     | WNK1     |
| DLG4     | KMT2C   | POTEF     | ZFHX3    |
| DOPEY1   | KMT2D   | PTEN      | ZFP36L1  |
| DUX4L4   | KRAS    | RAB11FIP1 | ZFYVE26  |

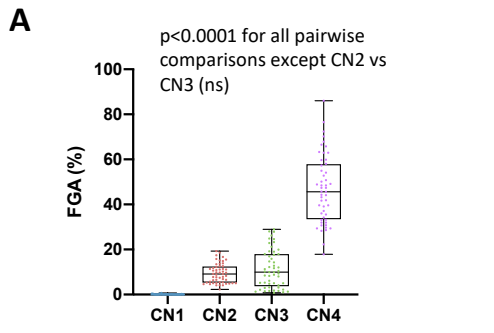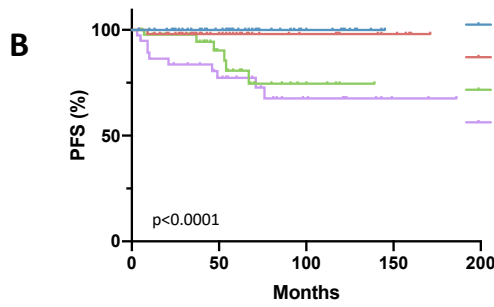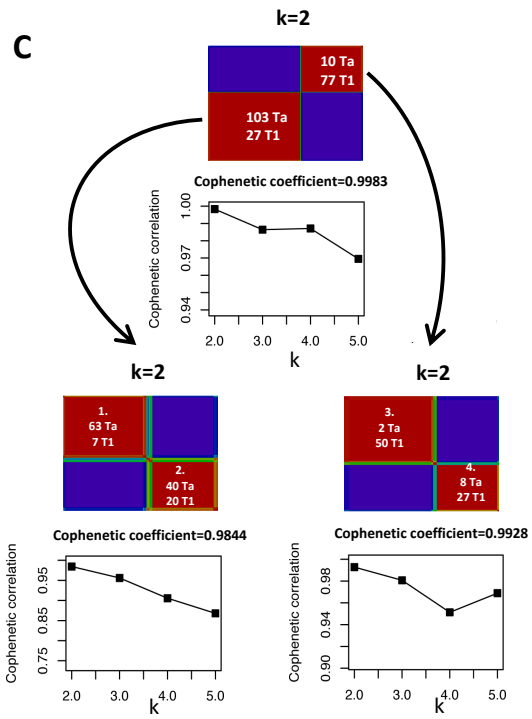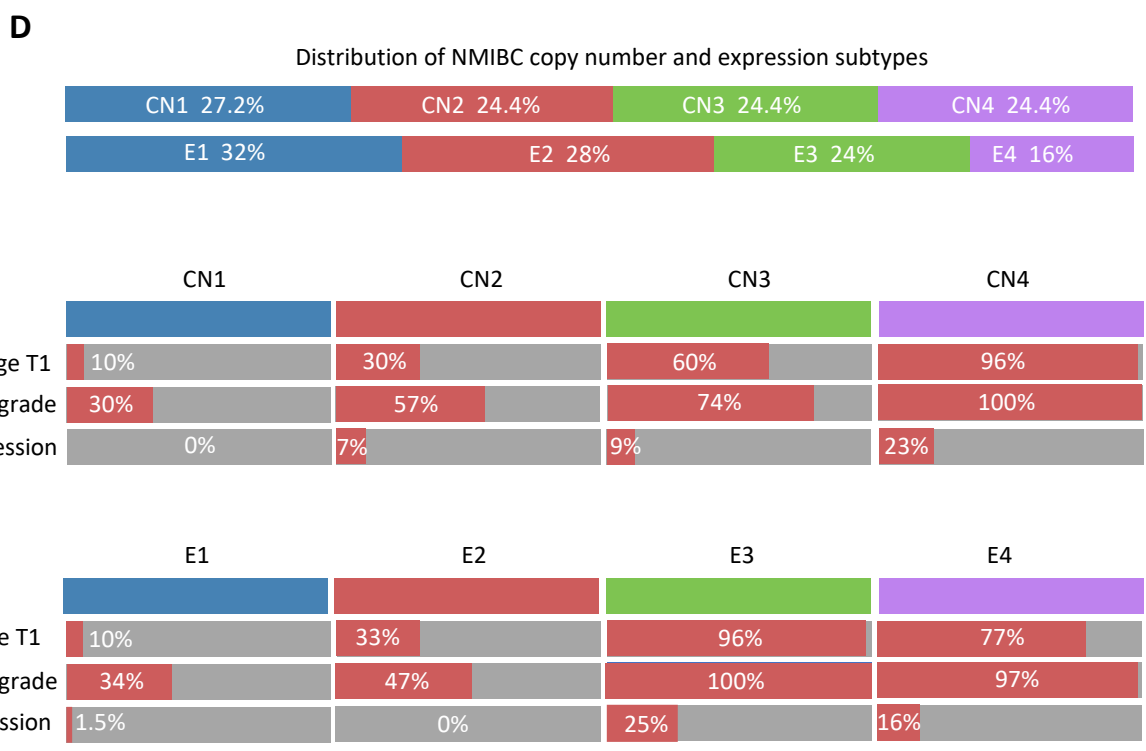

**Supplementary Figure 1. Features of copy number and expression subtypes of all 217 NMIBC. Related to Figure 1.**

**(A)** Fraction of genome altered (FGA) in copy number subtypes CN1-CN4. Analysis of copy number data from NGS and array-based platforms was restricted to those genomic regions associated with BAC clones present on the 1Mb resolution CGH array. Each region was assigned a copy number class (0 = no copy number alteration; 1 = gain; 2 = high-level amplification; -1 = loss; -2 = high-level loss). FGA is defined as the percentage of clones reporting significantly altered copy number (gain or loss).

**(B)** Kaplan-Meier plots of progression-free survival (PFS) of NMIBC patients according to Fraction of Genome Altered (FGA) with tumors assigned to arbitrary groups with <1% FGA (A), 1-<10% FGA (B), 10-<30% FGA (C) and  $\geq 30\%$  FGA (D).

**(C)** Derivation of four NMIBC expression subtypes by two stage NMF analysis, showing subdivision of tumors of stage Ta and T1 into clusters and plots of cophenetic coefficients among k clusters for each analysis.

**(D)** Top, distribution of copy number and expression subtypes in 217 NMIBC. Lower panels show tumor stage, grade and progression frequencies according to subtypes.

**(A)** Kruskal-Wallis test with Dunn's multiple comparison correction. Mean, 25th and 75<sup>th</sup> percentiles, minimum and maximum values are shown. **(B)** Log-rank analysis.



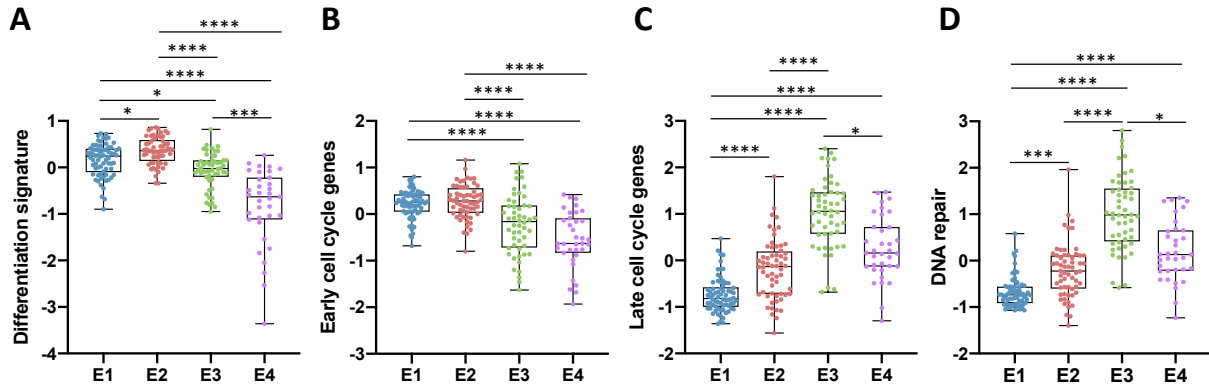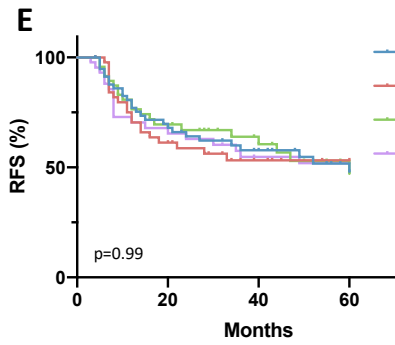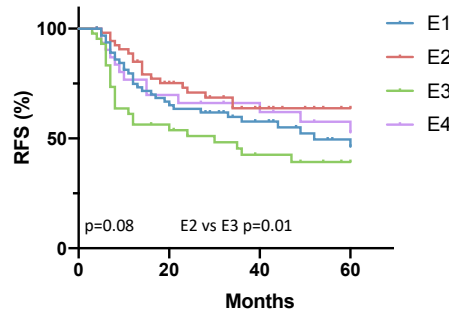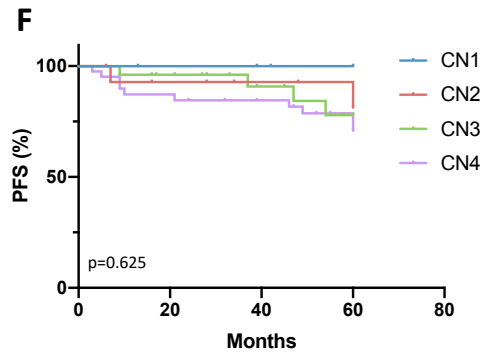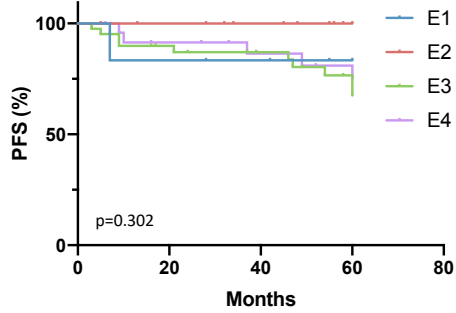

**Supplementary Figure 2. Expression signatures, recurrence-free survival and progression-free survival of NMIBC subtypes. Related to Figure 1.**

**(A)** Urothelial differentiation signature in NMIBC expression subtypes.

**(B)** Expression of early cell cycle genes in NMIBC expression subtypes.

**(C)** Expression of late cell cycle genes in NMIBC expression subtypes.

**(D)** Expression of DNA repair genes in NMIBC expression subtypes.

**(E)** Kaplan-Meier plots of recurrence-free survival (RFS) according to NMIBC copy number subtypes CN1-CN4 (left) and expression subtypes E1-E4 (right).

**(F)** Kaplan-Meier plots of PFS of patients with T1 tumors only according to NMIBC copy number (left) and expression subtypes (right).

**(A-D)** Group measurements compared using Kruskal-Wallis test with Dunn's multiple comparison correction. Mean, 25<sup>th</sup> and 75<sup>th</sup> percentiles, minimum and maximum values are shown. Adjusted p values; \*\*\*\*p<0.0001, \*\*\*p<0.001, \*\*p<0.01, \*p<0.05. **(E and F)** Log-rank analysis.



**Supplementary Figure 3. Features of stage Ta tumors according to Ta-derived genomic and expression subtypes. Related to Figure 2.**

**(A)** Heatmaps of z-scores derived by clustering of expression levels of differentially expressed gene categories in genomic subtypes GS1 and GS2. Top bar in each panel indicates GS1 and GS2 assignment.

**(B)** Recurrence-free survival (RFS) according to high and low tumor grade. Log-rank analysis.

**(C)** Percentage of APOBEC-related mutations according to Ta tumor genomic subtype.

**(D)** mRNA expression levels of APOBEC3A, 3B and 3H in Ta genomic subtype tumors.

**(E)** Left, plot of NMF consensus clusters for three Ta expression subtypes TaE1-TaE3. Right, plot showing cophenetic coefficients among k clusters.

**(F)** Relationships of Ta genomic and expression subtypes.

**(G)** Volcano plots of genes differentially expressed (LIMMA test) between Ta tumor expression subtypes TaE1-TaE3 with false discovery rate  $p < 0.01$ . Numbers of significantly up-regulated genes in each comparison are indicated at the top of each plot. Selected genes are indicated.

**(B)** Log-rank analysis. **(C and D)** Mann-Whitney test. Mean, 25<sup>th</sup> and 75<sup>th</sup> percentiles, minimum and maximum values are shown. **(F)** Chi-square test with Bonferroni correction.

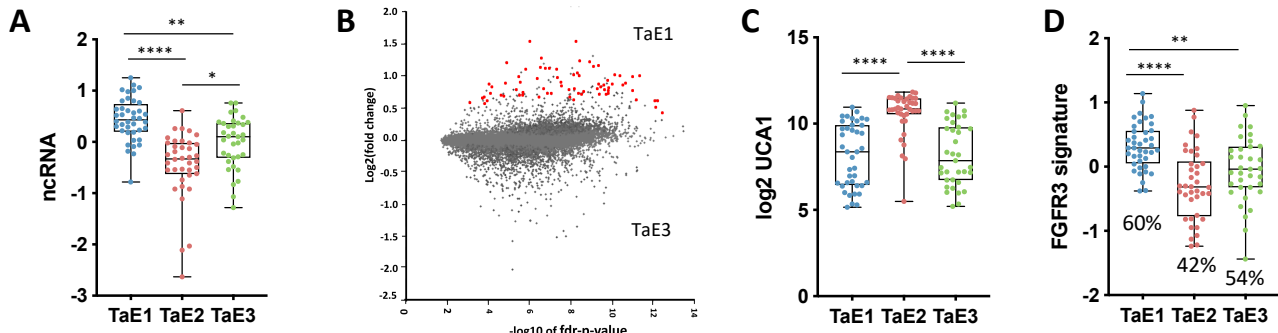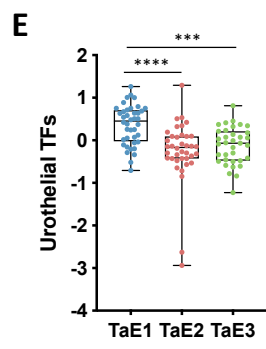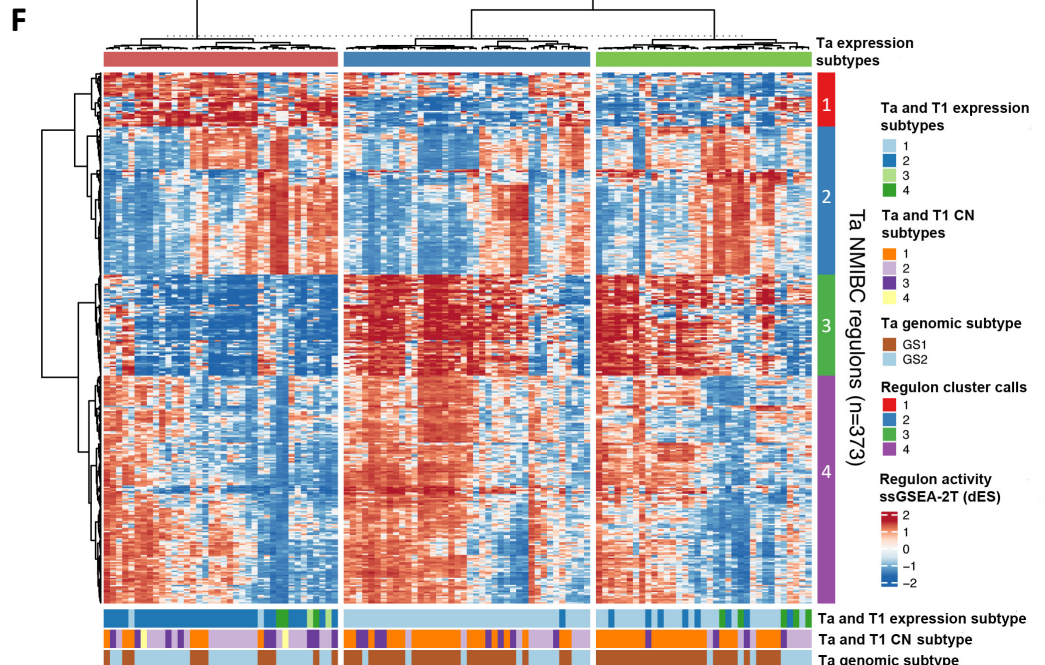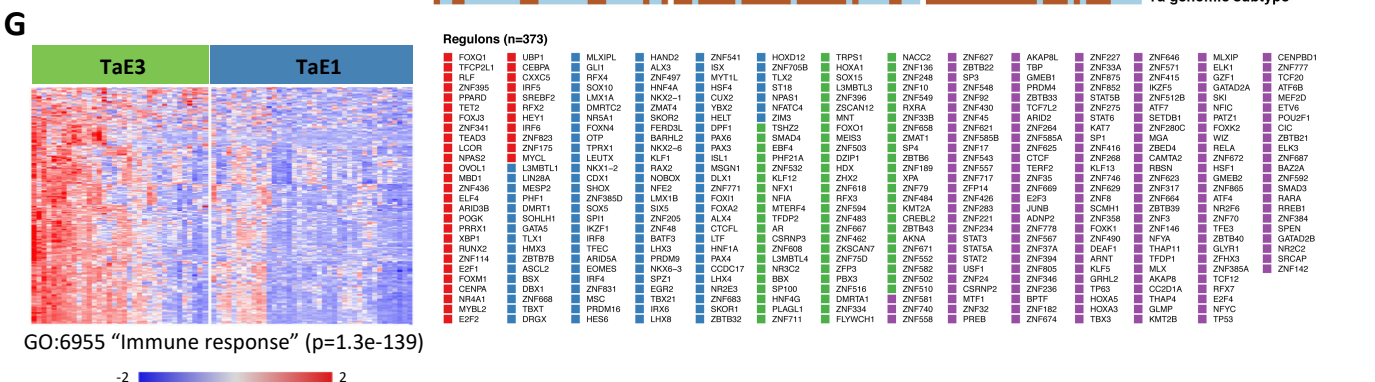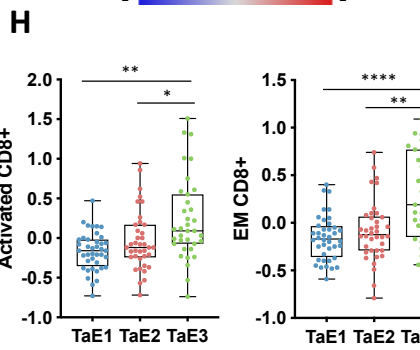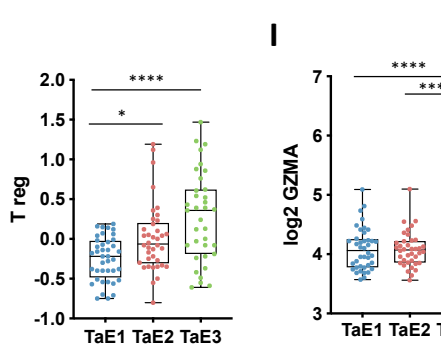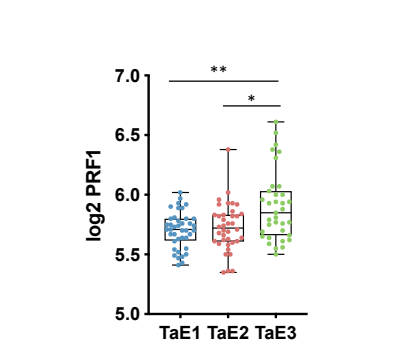

**Supplementary Figure 4. Expression differences between stage Ta tumor genomic and expression subtypes. Related to Figure 2.**

(A) Non-coding RNA signature (GO:16070) according to Ta expression subtypes.

(B) MA plot of genes differentially expressed between TaE1 and T1E3. Small nucleolar RNAs with higher expression in T1E1 are marked in red.

(C) Expression of UCA1 in Ta expression subtypes.

(D) FGFR3-related signature according to Ta expression subtypes. *FGFR3* mutation frequencies are indicated.

(E) Scores for expression of transcription factors (TFs) implicated in urothelial differentiation.

(F) Heatmap of regulon activity for 373 regulons with differential activity in stage Ta tumors supervised by Ta expression subtype. Expression and genomic covariates are shown below.

(G) Heatmap of z-scores for genes in GO:6955 “Immune response” in Ta expression subtypes TaE1 and TaE3.

(H) Scores for selected immune signatures [S1] in Ta expression subtypes. Activated DC8+ (left); EM, effector memory (middle); T reg, T regulatory (right).

(I) Expression levels of granzyme (GZMA) (left) and perforin 1 (PRF1) (right) in Ta expression subtypes.

(A, C, D, E, H and I) Group measurements compared using Kruskal-Wallis test with Dunn’s multiple comparison correction. Mean, 25<sup>th</sup> and 75<sup>th</sup> percentiles, minimum and maximum values are shown. Adjusted p values; \*\*\*\*p<0.0001, \*\*\*p<0.001, \*\*p<0.01, \*p<0.05.

**Table S4. snoRNAs differentially expressed in comparisons of Ta expression subgroups. Related to Figure 2.**

| TaE1 vs 2   |             | TaE1 vs 3   |             |
|-------------|-------------|-------------|-------------|
| SNORA11     | SNORD119    | SNORA11     | SNORD15B    |
| SNORA12     | SNORD11B    | SNORA12     | SNORD18A    |
| SNORA14A    | SNORD12     | SNORA14A    | SNORD32B    |
| SNORA20     | SNORD126    | SNORA20     | SNORD35B    |
| SNORA21     | SNORD127    | SNORA21     | SNORD37     |
| SNORA22     | SNORD12B    | SNORA22     | SNORD41     |
| SNORA23     | SNORD13     | SNORA23     | SNORD42A    |
| SNORA24     | SNORD14E    | SNORA24     | SNORD46     |
| SNORA26     | SNORD15B    | SNORA26     | SNORD58A    |
| SNORA30     | SNORD18A    | SNORA30     | SNORD58C    |
| SNORA37     | SNORD32B    | SNORA37     | SNORD59B    |
| SNORA47     | SNORD35B    | SNORA47     | SNORD60     |
| SNORA48     | SNORD37     | SNORA48     | SNORD61     |
| SNORA49     | SNORD41     | SNORA49     | SNORD70     |
| SNORA50     | SNORD42A    | SNORA50     | SNORD71     |
| SNORA52     | SNORD46     | SNORA52     | SNORD78     |
| SNORA54     | SNORD58A    | SNORA54     | SNORD8      |
| SNORA57     | SNORD58C    | SNORA57     | SNORD82     |
| SNORA5A     | SNORD59B    | SNORA5A     | SNORD85     |
| SNORA65     | SNORD60     | SNORA65     | SNORD9      |
| SNORA68     | SNORD61     | SNORA68     | SNORD91B    |
| SNORA71B    | SNORD70     | SNORA71B    | SNORD92     |
| SNORD10     | SNORD71     | SNORD10     | SNORD94     |
| SNORD104    | SNORD78     | SNORD104    | SNORD97     |
| SNORD105    | SNORD8      | SNORD105    | SNORD99     |
| SNORD105B   | SNORD82     | SNORD105B   | SNORA28     |
| SNORD11     | SNORD85     | SNORD11     | SNORA71D    |
| SNORD111    | SNORD9      | SNORD111    | SNORA76     |
| SNORD111B   | SNORD91B    | SNORD111B   | SNORD12C    |
| SNORD116-1  | SNORD92     | SNORD116-1  | SNORD59A    |
| SNORD116-11 | SNORD94     | SNORD116-11 | SNORD63     |
| SNORD116-12 | SNORD97     | SNORD116-12 | SNORA10     |
| SNORD116-14 | SNORD99     | SNORD116-14 | SNORA14B    |
| SNORD116-15 | SNORA45     | SNORD116-15 | SNORA16B    |
| SNORD116-16 | SNORD113-5  | SNORD116-16 | SNORA38B    |
| SNORD116-18 | SNORD115-14 | SNORD116-18 | SNORA5C     |
| SNORD116-2  | SNORD53     | SNORD116-2  | SNORA70C    |
| SNORD116-23 | SNORD93     | SNORD116-23 | SNORA70D    |
| SNORD116-24 | SNORA28     | SNORD116-24 | SNORA70E    |
| SNORD116-25 | SNORA71D    | SNORD116-25 | SNORA71A    |
| SNORD116-26 | SNORA76     | SNORD116-26 | SNORA71C    |
| SNORD116-27 | SNORD12C    | SNORD116-27 | SNORA80B    |
| SNORD116-29 | SNORD59A    | SNORD116-29 | SNORD121A   |
| SNORD116-8  | SNORD63     | SNORD116-8  | SNORD123    |
| SNORD117    | SNORD90     | SNORD117    | SNORD14A    |
|             |             | SNORD119    | SNORD15A    |
|             |             | SNORD11B    | SNORD16     |
|             |             | SNORD12     | SNORD3A     |
|             |             | SNORD126    | SNORD3C     |
|             |             | SNORD127    | SNORD69     |
|             |             | SNORD12B    | SNORD83A    |
|             |             | SNORD13     | SNORD91A    |
|             |             | SNORD14E    | SNORD116-13 |

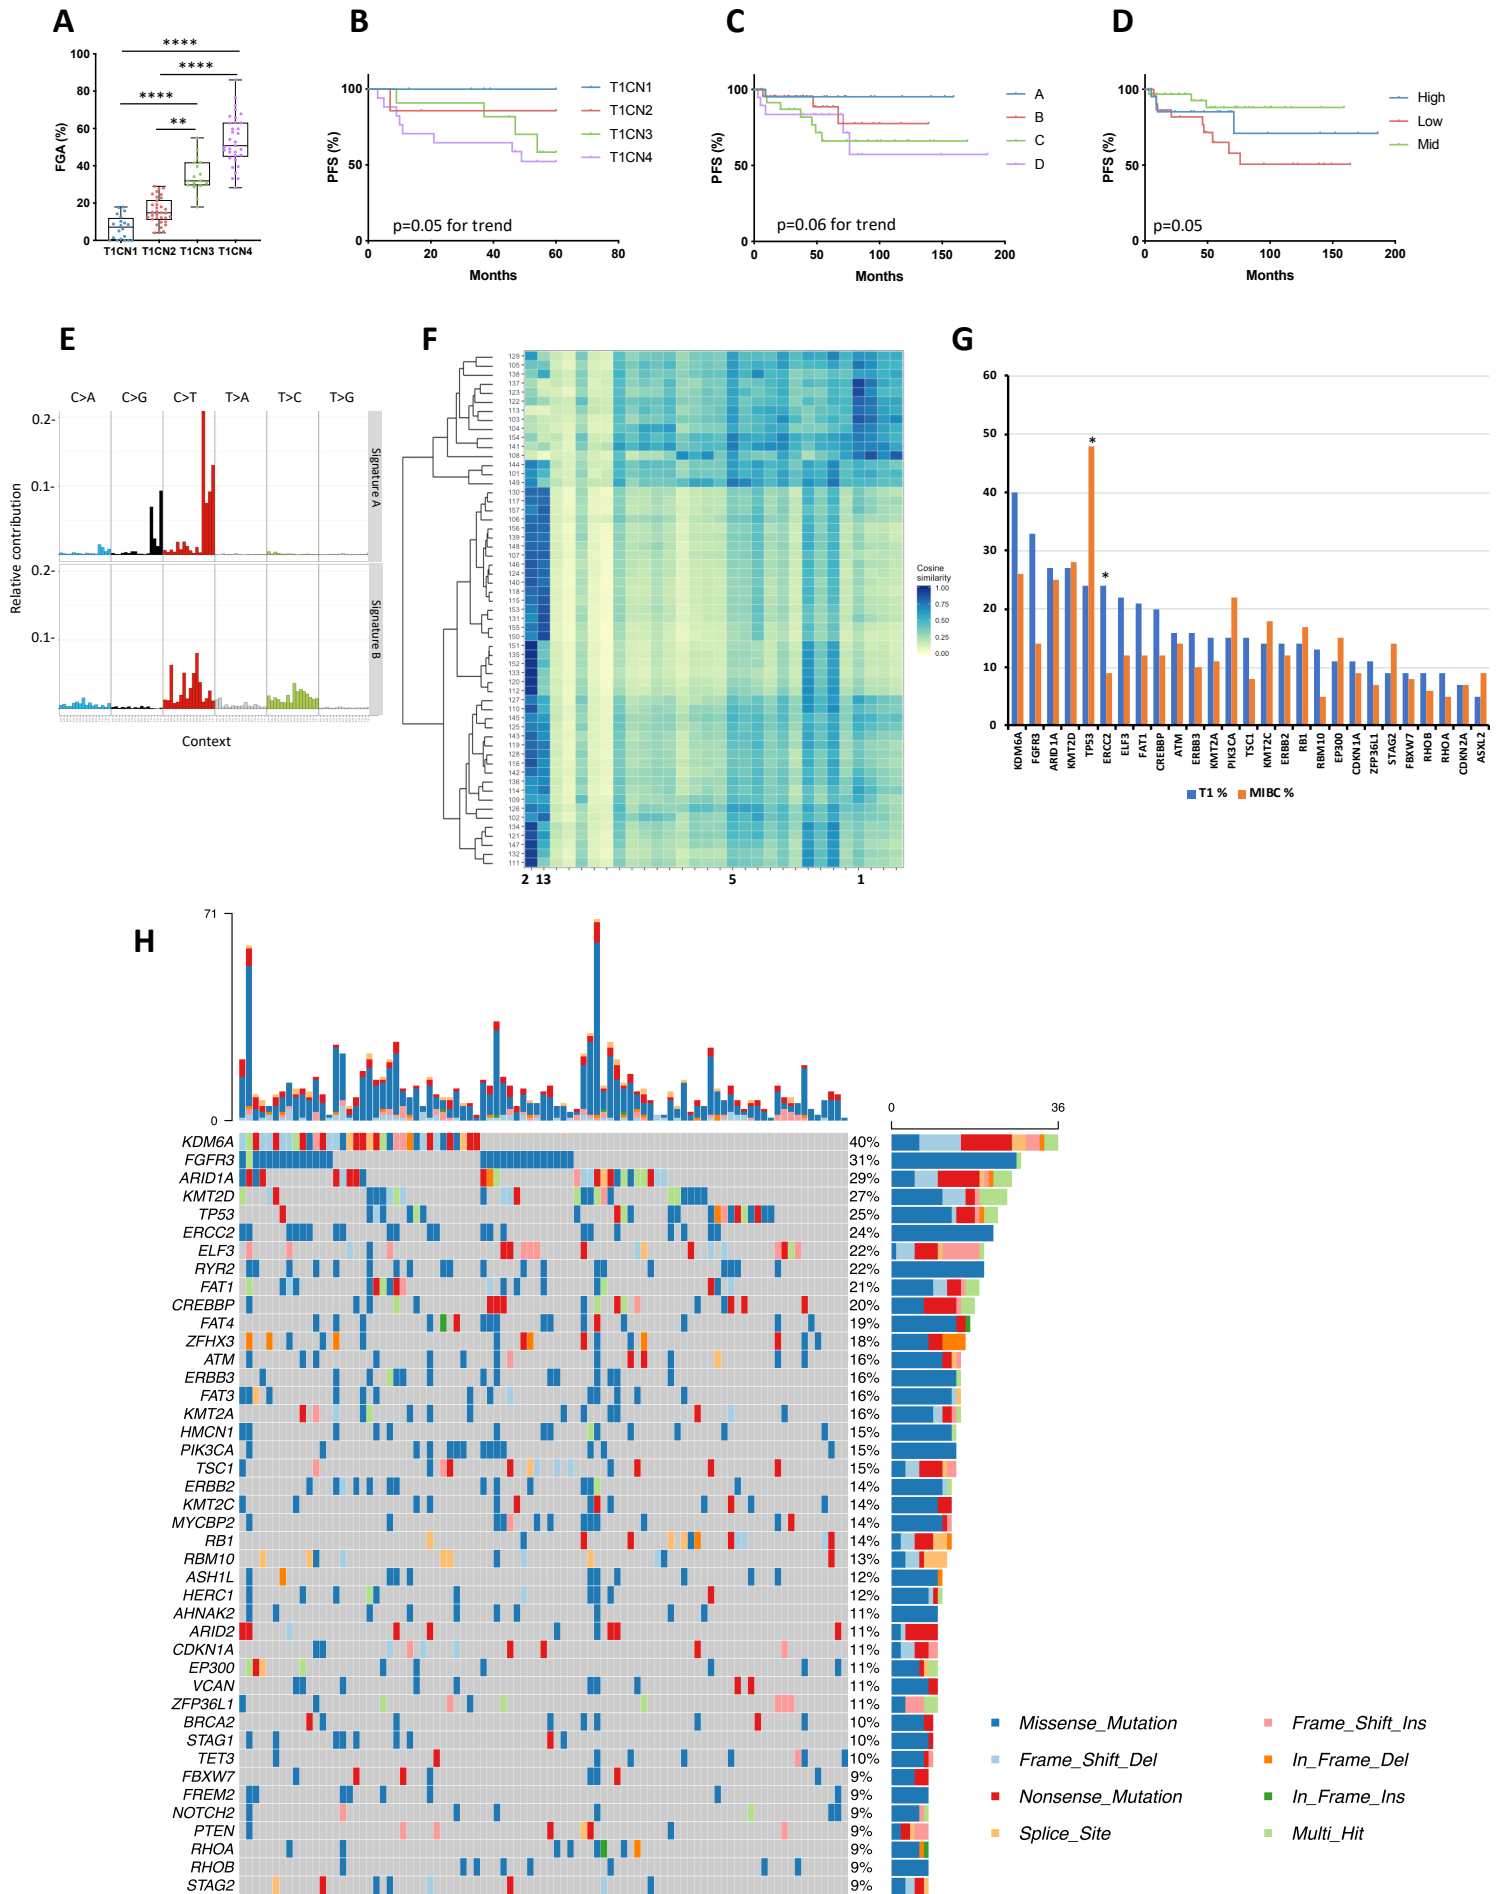



**Supplementary Figure 5. Genomic features of stage T1 tumors. Related to Figure 3.**

- (A) Fraction of Genome Altered (FGA%) according to T1 copy number subtypes T1CN1-T1CN4.
- (B) Kaplan-Meier plots of PFS according to T1 copy number subtypes T1CN1-T1CN4.
- (C) Kaplan-Meier plots of PFS according to Fraction of Genome Altered (FGA) of patients with T1 tumors assigned to arbitrary groups with <1% FGA (A), 1-<10% FGA (B), 10-<30% FGA (C) and  $\geq$ 30% FGA (D).
- (D) Kaplan-Meier plots of progression-free survival (PFS) according to tumor mutational burden. High, top 25%; Mid, middle 50%; Low, lowest 25%.
- (E) Trinucleotide mutational profiles from two signatures extracted from whole exome data using NMF analysis in MutationalPatterns.
- (F) Heatmap generated in MutationalPatterns showing identification of COSMIC mutational signatures in T1 tumors. Signatures 2 and 13 which are attributed to the activity of APOBEC cytidine deaminases, SBS1 and SBS5 are indicated.
- (G) Comparison of the frequencies of mutations identified  $\geq$  5% of T1 tumors with those reported in muscle-invasive bladder tumors [S2].
- (H) Oncoplot showing genes mutated in  $\geq$  9% of T1 tumors. Data for genes included in the 140 gene target capture. See Table S5 for prediction of oncogenic drivers from whole exome data.
- (A) Kruskal-Wallis test with Dunn's multiple comparison correction. Mean, 25<sup>th</sup> and 75<sup>th</sup> percentiles, minimum and maximum values are shown. Adjusted p values; \*\*\*\*p<0.0001, \*\*p<0.01. (B-D) Log-rank analysis. (G) Fisher's exact test with Bonferroni correction. Asterisks indicate p<0.01.

Table S6. dNdScv analysis of exome data from T1 tumors. Related to Figure 3.

| Gene    | Synonymous mutations | Missense mutations | Nonsense mutations | Essential splice site | Indels | dN/dS – missense* | dN/dS – nonsense* | dN/dS – indels* | q-value missense mutations | q-value truncating mutations | q-value (all genes) | q-value (known bladder cancer genes) | significance all genes | known bladder cancer genes |
|---------|----------------------|--------------------|--------------------|-----------------------|--------|-------------------|-------------------|-----------------|----------------------------|------------------------------|---------------------|--------------------------------------|------------------------|----------------------------|
| KDM6A   | 2                    | 4                  | 9                  | 2                     | 12     | 1.485510846       | 28.06428314       | 59.51189176     | 0.792690954                | 1.84E-06                     | 2.17E-12            | 6.88E-15                             | TRUE                   | TRUE                       |
| TP53    | 0                    | 13                 | 4                  | 0                     | 4      | 20.25419979       | 58.93851075       | 71.99831236     | 3.16E-05                   | 0.010714376                  | 6.84E-11            | 2.17E-13                             | TRUE                   | TRUE                       |
| ELF3    | 1                    | 4                  | 2                  | 0                     | 9      | 5.371672988       | 26.28859173       | 171.5766234     | 0.783760701                | 0.897278091                  | 1.82E-09            | 5.76E-12                             | TRUE                   | TRUE                       |
| ARID1A  | 2                    | 8                  | 11                 | 1                     | 6      | 1.970017649       | 30.86657391       | 18.61373692     | 0.783760701                | 2.87E-07                     | 4.48E-09            | 1.42E-11                             | TRUE                   | TRUE                       |
| FGFR3   | 2                    | 21                 | 0                  | 0                     | 2      | 11.86845137       | 0                 | 17.53234553     | 1.77E-05                   | 0.897278091                  | 4.73E-06            | 1.50E-08                             | TRUE                   | TRUE                       |
| RB1     | 0                    | 0                  | 3                  | 1                     | 5      | 0                 | 19.58206803       | 38.16918067     | 0.783760701                | 0.384810895                  | 0.000228603         | 7.25E-07                             | TRUE                   | TRUE                       |
| CDKN1A  | 0                    | 2                  | 1                  | 0                     | 4      | 6.352842167       | 28.29451632       | 171.9232429     | 0.783760701                | 0.897278091                  | 0.00043603          | 1.38E-06                             | TRUE                   | TRUE                       |
| KMT2D   | 2                    | 13                 | 8                  | 2                     | 7      | 1.785312361       | 14.09890579       | 8.964036904     | 0.783760701                | 0.002188136                  | 0.00043603          | 1.38E-06                             | TRUE                   | TRUE                       |
| ZFP36L1 | 1                    | 5                  | 1                  | 0                     | 4      | 7.453908566       | 30.21378992       | 83.67945449     | 0.783760701                | 0.897278091                  | 0.00043603          | 1.38E-06                             | TRUE                   | TRUE                       |
| ARID2   | 1                    | 4                  | 10                 | 0                     | 0      | 1.411549215       | 24.34705699       | 0               | 0.817148289                | 4.00E-05                     | 0.000820136         | 2.60E-06                             | TRUE                   | TRUE                       |
| FAM229A | 0                    | 3                  | 0                  | 0                     | 3      | 11.49345738       | 0                 | 166.2148539     | 0.783760701                | 0.897357875                  | 0.003971316         | NA                                   | TRUE                   | FALSE                      |
| ERCC2   | 1                    | 13                 | 0                  | 0                     | 1      | 9.508835961       | 0                 | 9.31909825      | 0.020714612                | 0.897278091                  | 0.028903276         | 0.0001057                            | FALSE                  | TRUE                       |
| SPA17   | 0                    | 2                  | 0                  | 0                     | 3      | 7.424679135       | 0                 | 139.9704033     | 0.783760701                | 0.897278091                  | 0.028903276         | NA                                   | FALSE                  | FALSE                      |
| TSC1    | 5                    | 7                  | 3                  | 2                     | 3      | 1.955453408       | 13.71759019       | 18.26223288     | 0.783760701                | 0.263760412                  | 0.028903276         | 0.0001057                            | FALSE                  | TRUE                       |
| PTEN    | 0                    | 2                  | 2                  | 0                     | 3      | 3.11728669        | 28.404692         | 52.66213194     | 0.783760701                | 0.897278091                  | 0.028903276         | 0.0001057                            | FALSE                  | TRUE                       |
| CREBBP  | 0                    | 12                 | 5                  | 0                     | 3      | 4.380993841       | 16.70750866       | 8.708760255     | 0.783760701                | 0.263760412                  | 0.033449633         | 0.000121161                          | FALSE                  | TRUE                       |
| EP300   | 8                    | 13                 | 3                  | 0                     | 7      | 1.58981765        | 2.760988549       | 20.55603991     | 0.783760701                | 0.897278091                  | 0.264231139         | 0.0012841                            | FALSE                  | TRUE                       |
| ERBB3   | 1                    | 12                 | 0                  | 0                     | 1      | 5.501520469       | 0                 | 5.280591041     | 0.783760701                | 0.897278091                  | 0.999804434         | 0.007835389                          | FALSE                  | TRUE                       |
| PIK3CA  | 1                    | 10                 | 0                  | 0                     | 1      | 5.452910411       | 0                 | 6.634082103     | 0.783760701                | 0.897278091                  | 0.999804434         | 0.011517583                          | FALSE                  | TRUE                       |
| STAG2   | 1                    | 2                  | 1                  | 1                     | 3      | 0.861942431       | 6.510764538       | 16.76556446     | 0.940156287                | 0.897278091                  | 0.999804434         | 0.016367923                          | FALSE                  | TRUE                       |
| FBXW7   | 2                    | 7                  | 3                  | 0                     | 0      | 4.564784934       | 16.05640084       | 0               | 0.783760701                | 0.897278091                  | 0.999804434         | 0.016460315                          | FALSE                  | TRUE                       |
| ERBB2   | 5                    | 13                 | 0                  | 1                     | 1      | 3.896005194       | 3.101184214       | 5.646364465     | 0.783760701                | 0.897278091                  | 0.999804434         | 0.021392185                          | FALSE                  | TRUE                       |
| RHOA    | 1                    | 3                  | 0                  | 0                     | 1      | 8.248049147       | 0                 | 36.55584416     | 0.783760701                | 0.897278091                  | 0.999804434         | 0.024896042                          | FALSE                  | TRUE                       |
| KANSL1  | 0                    | 0                  | 2                  | 0                     | 1      | 0                 | 11.5226294        | 6.412146264     | 0.783760701                | 0.897278091                  | 0.999804434         | 0.025531368                          | FALSE                  | TRUE                       |
| GNA13   | 2                    | 5                  | 0                  | 0                     | 1      | 5.485490625       | 0                 | 18.76146499     | 0.783760701                | 0.897278091                  | 0.999804434         | 0.028946739                          | FALSE                  | TRUE                       |

\* Maximum likelihood estimates obtained by dNdScv for missense mutations, nonsense mutations and indels.

Grey shading indicates results from restricted hypothesis testing of known bladder cancer genes (qrht < 0.05).

FAM229A excluded as somatic missense mutations create a rare germline SNP of unknown significance.

SPA17 excluded as all mutations in same sample.

**Table S7. *ERBB2* and *ERBB3* mutations and *ERBB2* copy number in T1 tumors. Related to Figure 4.**

| Sample | <i>ERBB2</i> mutation | <i>ERBB3</i> mutation | <i>ERBB2</i> copy number status | <i>ERCC2</i> mutation status | Expression subtype | Copy number subtype |
|--------|-----------------------|-----------------------|---------------------------------|------------------------------|--------------------|---------------------|
| 1081   | NA                    | NA                    | Normal                          | NA                           | 1                  | 1                   |
| 1106   | p.S310F; p.C311Sfs*10 | p.P590S               | Normal                          | p.E606K; p.V604Rfs*103       | 1                  | 1                   |
| 1137   | Wildtype              | Wildtype              | Normal                          | p.T484M                      | 1                  | 1                   |
| 1315   | NA                    | NA                    | Normal                          | NA                           | 1                  | 1                   |
| 1408   | Wildtype              | Wildtype              | Loss                            | p.E86Q                       | 1                  | 1                   |
| 2020   | Wildtype              | Wildtype              | Normal                          | Wildtype                     | 1                  | 1                   |
| 2046   | Wildtype              | Wildtype              | Normal                          | Wildtype                     | 1                  | 1                   |
| 2390   | Wildtype              | Wildtype              | Normal                          | p.N238S                      | 1                  | 1                   |
| 589    | NA                    | NA                    | Normal                          | NA                           | 2                  | 1                   |
| 1062   | p.A1243T; c.1737+2T>C | p.G284R               | Normal                          | Wildtype                     | 2                  | 1                   |
| 571    | NA                    | NA                    | Normal                          | NA                           | 3                  | 1                   |
| 1279   | p.D636Pfs*8           | Wildtype              | Normal                          | p.N238S                      | 3                  | 1                   |
| 1318   | Wildtype              | Wildtype              | Normal                          | p.T76I                       | 3                  | 1                   |
| 1747   | Wildtype              | Wildtype              | Normal                          | p.V242F                      | 3                  | 1                   |
| 1831   | p.N259S               | p.E150K               | Normal                          | p.S381F; p.T484M             | 3                  | 1                   |
| 2165   | Wildtype              | Wildtype              | Normal                          | Wildtype                     | 3                  | 1                   |
| 2437   | Wildtype              | Wildtype              | Normal                          | Wildtype                     | 3                  | 1                   |
| 1729   | Wildtype              | Wildtype              | Normal                          | Wildtype                     | 4                  | 1                   |
| 1766   | Wildtype              | p.M433I               | Normal                          | p.G665A                      | 4                  | 1                   |
| 2138   | Wildtype              | Wildtype              | Normal                          | Wildtype                     | 4                  | 1                   |
| 94     | Wildtype              | Wildtype              | Normal                          | Wildtype                     | 1                  | 2                   |
| 315    | NA                    | NA                    | Normal                          | NA                           | 1                  | 2                   |
| 557    | Wildtype              | Wildtype              | Amp/Gain                        | Wildtype                     | 1                  | 2                   |
| 866    | NA                    | NA                    | Normal                          | NA                           | 1                  | 2                   |
| 1094   | NA                    | NA                    | Normal                          | NA                           | 1                  | 2                   |
| 1210   | NA                    | NA                    | Amp/Gain                        | NA                           | 1                  | 2                   |
| 1222   | Wildtype              | Wildtype              | Normal                          | Wildtype                     | 1                  | 2                   |
| 1481   | Wildtype              | Wildtype              | Normal                          | Wildtype                     | 1                  | 2                   |
| 1968   | Wildtype              | Wildtype              | Normal                          | Wildtype                     | 1                  | 2                   |
| 2103   | p.S310F               | Wildtype              | Amp/Gain                        | Wildtype                     | 1                  | 2                   |
| 2272   | Wildtype              | Wildtype              | Normal                          | Wildtype                     | 1                  | 2                   |
| 1358   | Wildtype              | p.R679Q               | Amp/Gain                        | Wildtype                     | 2                  | 2                   |
| 1428   | Wildtype              | Wildtype              | Normal                          | p.N238S                      | 2                  | 2                   |
| 1457   | Wildtype              | Wildtype              | Normal                          | Wildtype                     | 2                  | 2                   |
| 1629   | Wildtype              | Wildtype              | Normal                          | Wildtype                     | 2                  | 2                   |
| 1978   | Wildtype              | p.V104L               | Normal                          | Wildtype                     | 2                  | 2                   |
| 2056   | Wildtype              | Wildtype              | Amp/Gain                        | Wildtype                     | 2                  | 2                   |
| 2155   | Wildtype              | Wildtype              | Amp/Gain                        | Wildtype                     | 2                  | 2                   |
| 555    | Wildtype              | Wildtype              | Normal                          | Wildtype                     | 3                  | 2                   |
| 936    | Wildtype              | Wildtype              | Normal                          | Wildtype                     | 3                  | 2                   |
| 940    | Wildtype              | Wildtype              | Normal                          | Wildtype                     | 3                  | 2                   |
| 1395   | Wildtype              | Wildtype              | Normal                          | Wildtype                     | 3                  | 2                   |
| 1443   | Wildtype              | Wildtype              | Amp/Gain                        | Wildtype                     | 3                  | 2                   |
| 1521   | Wildtype              | Wildtype              | Normal                          | Wildtype                     | 3                  | 2                   |
| 1633   | Wildtype              | Wildtype              | Normal                          | Wildtype                     | 3                  | 2                   |
| 1679   | Wildtype              | Wildtype              | Normal                          | Wildtype                     | 3                  | 2                   |
| 1810   | Wildtype              | Wildtype              | Normal                          | p.P463S                      | 3                  | 2                   |
| 1933   | Wildtype              | Wildtype              | Amp/Gain                        | Wildtype                     | 3                  | 2                   |
| 2175   | Wildtype              | Wildtype              | Normal                          | p.E86Q                       | 3                  | 2                   |
| 377    | Wildtype              | Wildtype              | Normal                          | Wildtype                     | 4                  | 2                   |
| 418    | Wildtype              | Wildtype              | Normal                          | Wildtype                     | 4                  | 2                   |
| 534    | Wildtype              | Wildtype              | Normal                          | Wildtype                     | 4                  | 2                   |
| 1234   | Wildtype              | Wildtype              | Amp/Gain                        | Wildtype                     | 4                  | 2                   |
| 1817   | p.R103Q               | p.Q298E               | Amp/Gain                        | p.Q662H                      | 4                  | 2                   |
| 1087   | Wildtype              | Wildtype              | Normal                          | Wildtype                     | 1                  | 3                   |
| 1138   | NA                    | NA                    | Normal                          | NA                           | 1                  | 3                   |
| 1145   | NA                    | NA                    | Normal                          | NA                           | 1                  | 3                   |
| 1325   | Wildtype              | Wildtype              | Normal                          | p.L633V                      | 1                  | 3                   |
| 1392   | Wildtype              | Wildtype              | Normal                          | Wildtype                     | 1                  | 3                   |
| 2429   | Wildtype              | Wildtype              | Normal                          | Wildtype                     | 1                  | 3                   |
| 567    | Wildtype              | Wildtype              | Normal                          | Wildtype                     | 2                  | 3                   |
| 1023   | Wildtype              | Wildtype              | Normal                          | Wildtype                     | 2                  | 3                   |

|      |                  |                 |          |          |   |   |
|------|------------------|-----------------|----------|----------|---|---|
| 1252 | Wildtype         | Wildtype        | Amp/Gain | Wildtype | 2 | 3 |
| 1300 | p.E766Q; p.G778D | p.G582E         | Normal   | Wildtype | 2 | 3 |
| 1407 | Wildtype         | Wildtype        | Normal   | Wildtype | 2 | 3 |
| 1517 | Wildtype         | Wildtype        | Normal   | Wildtype | 2 | 3 |
| 1735 | Wildtype         | Wildtype        | Normal   | Wildtype | 2 | 3 |
| 2022 | Wildtype         | Wildtype        | Amp/Gain | Wildtype | 2 | 3 |
| 1860 | p.V697L          | Wildtype        | Amp/Gain | p.N238S  | 3 | 3 |
| 2356 | Wildtype         | Wildtype        | Normal   | Wildtype | 3 | 3 |
| 2224 | p.R103Q          | p.Q298E         | Normal   | p.T76I   | 4 | 3 |
| 393  | Wildtype         | Wildtype        | Amp/Gain | Wildtype | 2 | 4 |
| 544  | Wildtype         | Wildtype        | Amp/Gain | Wildtype | 2 | 4 |
| 1211 | Wildtype         | Wildtype        | Loss     | Wildtype | 2 | 4 |
| 1934 | Wildtype         | Wildtype        | Amp/Gain | Wildtype | 2 | 4 |
| 2000 | Wildtype         | Wildtype        | Loss     | Wildtype | 2 | 4 |
| 2033 | p.L651V          | Wildtype        | Normal   | Wildtype | 2 | 4 |
| 2139 | p.S250F; p.S609Y | Wildtype        | Amp/Gain | p.N238S  | 2 | 4 |
| 2169 | Wildtype         | Wildtype        | Normal   | Wildtype | 2 | 4 |
| 2178 | Wildtype         | Wildtype        | Normal   | Wildtype | 2 | 4 |
| 2222 | Wildtype         | p.K747N         | Normal   | Wildtype | 2 | 4 |
| 132  | p.E238Q; p.S310F | p.I600M         | Normal   | Wildtype | 3 | 4 |
| 435  | p.E507K          | p.M91I; p.E150* | Amp/Gain | p.S246F  | 3 | 4 |
| 1047 | Wildtype         | Wildtype        | Amp/Gain | Wildtype | 3 | 4 |
| 1124 | Wildtype         | Wildtype        | Amp/Gain | Wildtype | 3 | 4 |
| 1974 | Wildtype         | Wildtype        | Normal   | Wildtype | 3 | 4 |
| 2058 | Wildtype         | Wildtype        | Amp/Gain | Wildtype | 3 | 4 |
| 411  | NA               | NA              | Amp/Gain | NA       | 4 | 4 |
| 930  | NA               | NA              | Amp/Gain | NA       | 4 | 4 |
| 1016 | Wildtype         | Wildtype        | Amp/Gain | Wildtype | 4 | 4 |
| 1249 | Wildtype         | Wildtype        | Normal   | Wildtype | 4 | 4 |
| 1419 | Wildtype         | p.V104L         | Normal   | p.T484M  | 4 | 4 |
| 1503 | Wildtype         | Wildtype        | Amp/Gain | Wildtype | 4 | 4 |
| 1530 | Wildtype         | Wildtype        | Normal   | Wildtype | 4 | 4 |
| 1559 | Wildtype         | Wildtype        | Amp/Gain | Wildtype | 4 | 4 |
| 1745 | Wildtype         | Wildtype        | Amp/Gain | Wildtype | 4 | 4 |
| 1853 | p.D277H          | Wildtype        | Amp/Gain | Wildtype | 4 | 4 |
| 1947 | Wildtype         | Wildtype        | Amp/Gain | p.R658G  | 4 | 4 |
| 2037 | Wildtype         | Wildtype        | Amp/Gain | Wildtype | 4 | 4 |
| 2064 | Wildtype         | Wildtype        | Amp/Gain | Wildtype | 4 | 4 |
| 2214 | Wildtype         | p.L74F          | Amp/Gain | p.Y24C   | 4 | 4 |
| 2223 | Wildtype         | p.D863N         | Normal   | p.E606Q  | 4 | 4 |
| 2267 | Wildtype         | Wildtype        | Normal   | p.N238S  | 4 | 4 |
| 2423 | Wildtype         | Wildtype        | Amp/Gain | Wildtype | 4 | 4 |

**A**

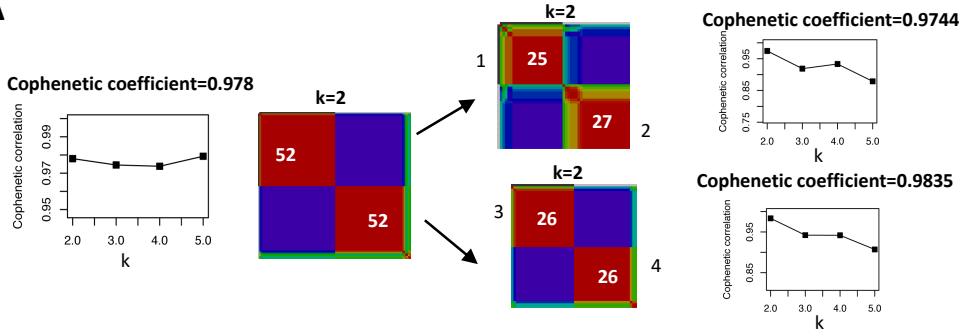

**B**

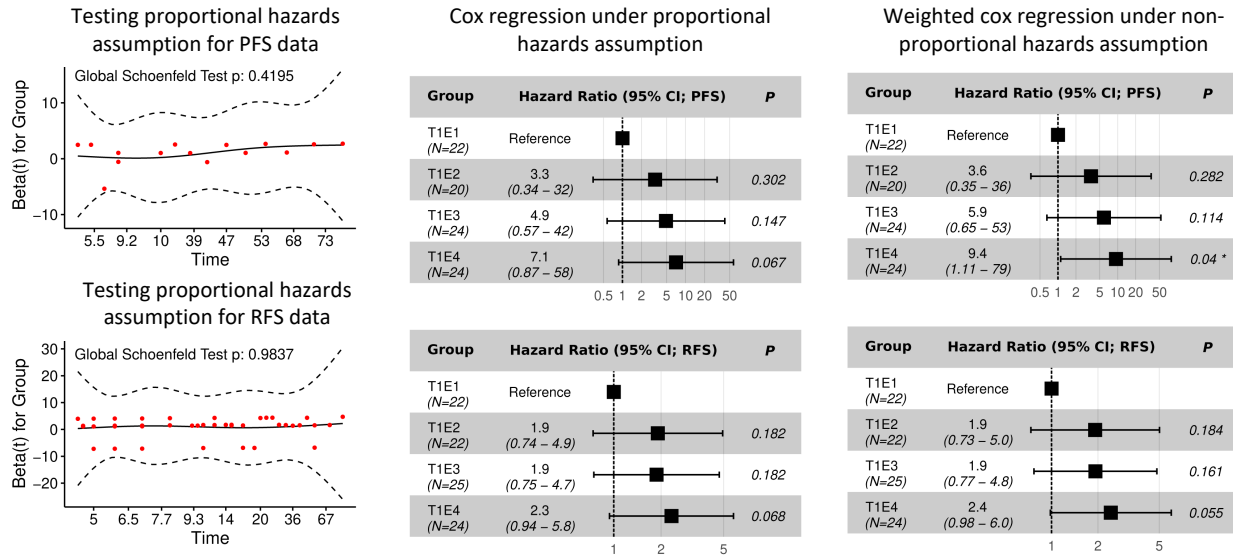

**C**

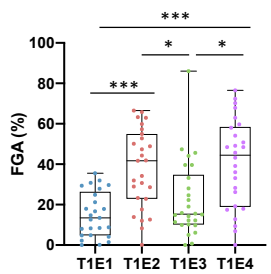

**D**

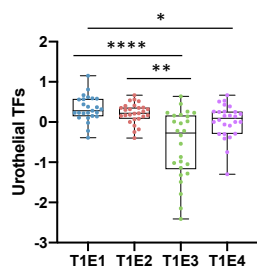

**E**

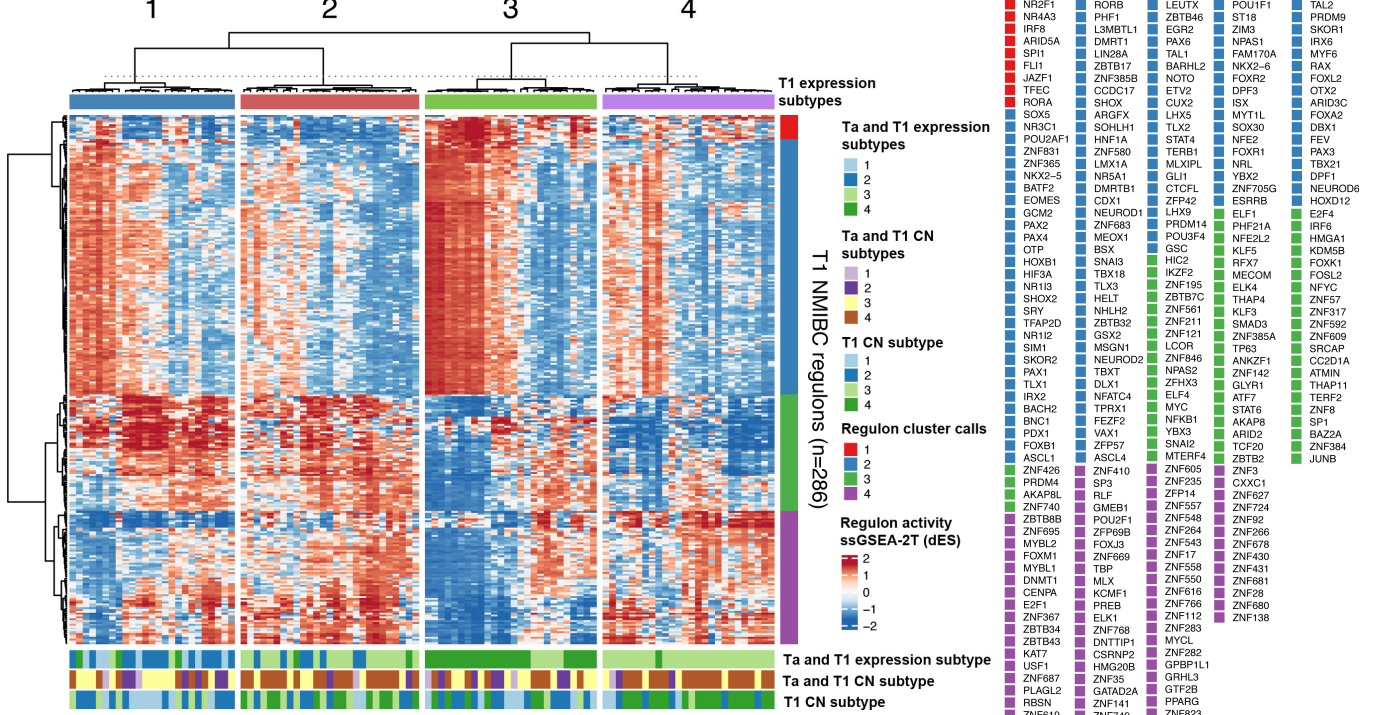

**Supplementary Figure 6. Derivation and features of T1 tumor expression subtypes. Related to Figure 5.**

**(A)** Derivation of four stage T1 expression subtypes by two stage NMF analysis, showing numbers of tumors in clusters and plots of cophenetic coefficients among k clusters for each analysis.

**(B)** Left, Schoenfeld plots for RFS and PFS data for T1 expression subtypes (see STAR Methods). Middle and right, forest plots showing results of Cox regression analyses under proportional and non-proportional hazards assumptions for RFS and PFS of T1 expression subtypes using the ‘coxph’ function (Therneau, 2021; R package version 3.2-13, 2021. <https://CRAN.R-project.org/package=survival>) and ‘coxphw’ [S3].

**(C)** Fraction of genome altered (FGA) according to T1 expression subtypes.

**(D)** Scores for expression of transcription factors (TFs) implicated in urothelial differentiation according to T1 expression subtypes.

**(E)** Heatmap of regulon activity for 286 regulons with differential activity in stage T1 tumors supervised by T1 expression subtype. Expression and genomic covariates are shown below.

**(C and D)** Kruskal-Wallis test with Dunn’s multiple comparison correction. Mean, 25<sup>th</sup> and 75<sup>th</sup> percentiles, minimum and maximum values are shown. Adjusted p values; \*\*\*\*p<0.0001, \*\*\*p<0.001, \*\*p<0.01, \*p<0.05.

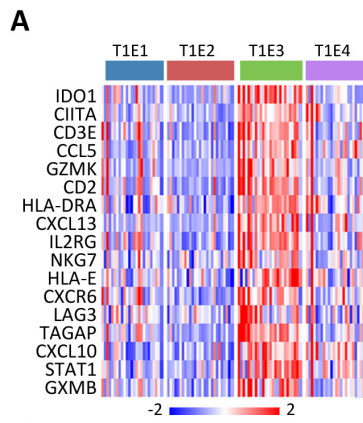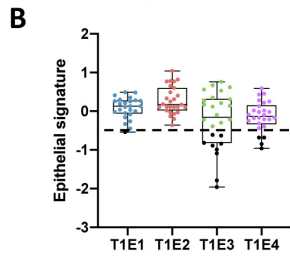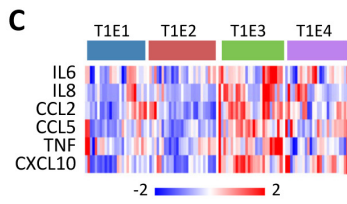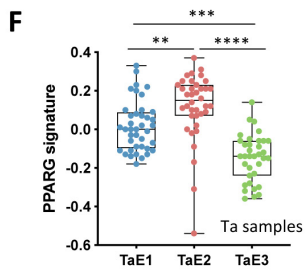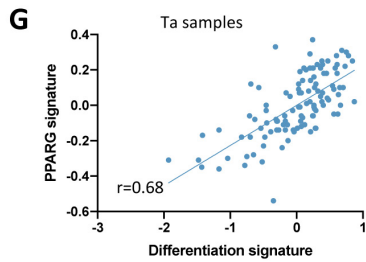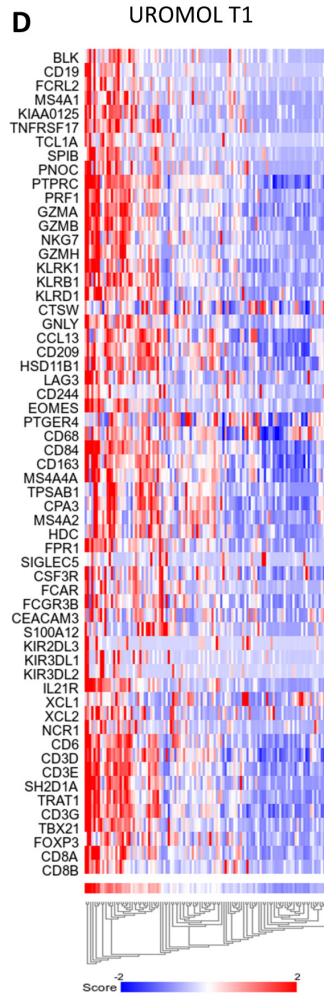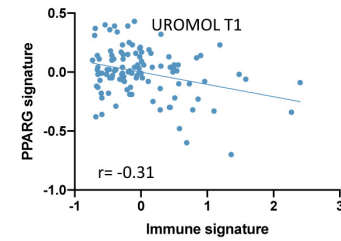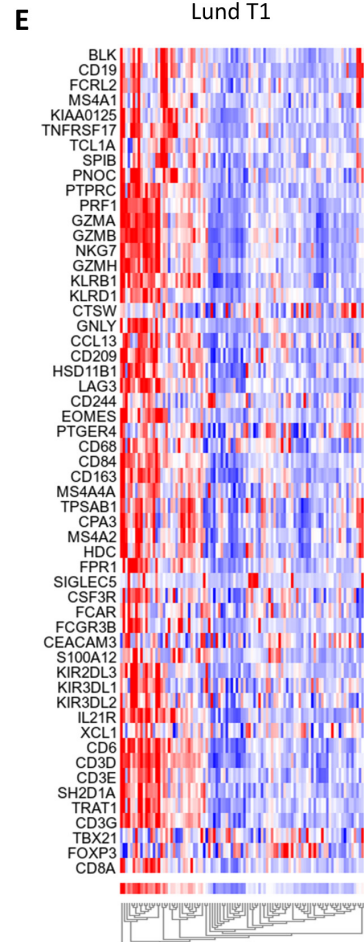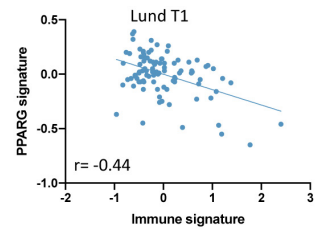

**Supplementary Figure 7. Relationship of PPARG signature to immune infiltration in NMIBC. Related to Figure 6.**

- (A) Heatmap of z-scores for genes in a T-cell inflamed signature [S4] in T1 expression subtypes.
- (B) Expression scores for a panel of epithelial marker genes (see Methods) used to provide an estimate of epithelial tumor cell content in T1 samples. Samples with zscores < -0.05 indicated by black dots were removed from analysis of the relationship of PPARG signature and tumor infiltration. Mean, 25<sup>th</sup> and 75<sup>th</sup> percentiles, minimum and maximum values are shown.
- (C) Heatmap of z-scores for pro-inflammatory chemokines that attract effector T cells that were shown to be regulated by PPARG in T24 bladder tumor cells [S5] in T1 expression subtypes.
- (D) Heatmap of z-scores for 60-gene immune signature [S6] in T1 tumors reported in the first UROMOL study [S7] (ArrayExpress: E-MTAB-4321). Graph below shows correlation of PPARG and immune signatures scores.
- (E) Heatmap of z-scores for 60-gene immune signature in T1 tumors from the study of Sjobahl *et al* [S8] (GSE: 32894). Graph below shows correlation of PPARG and immune signatures scores.
- (F) PPARG signature score in Ta expression subtypes.
- (G) Correlation of PPARG signature and urothelial differentiation signature in Ta samples.
- (F) Kruskal-Wallis test test with Dunn's multiple comparison correction. Mean, 25<sup>th</sup> and 75<sup>th</sup> percentiles, minimum and maximum values are shown. Adjusted p values; \*\*\*\*p<0.0001, \*\*\*p<0.001, \*\*p<0.01. (D and E lower panels and G) Pearson r.



## Supplemental references

- S1. Charoentong, P., Finotello, F., Angelova, M., Mayer, C., Efremova, M., Rieder, D., Hackl, H., and Trajanoski, Z. (2017). Pan-cancer Immunogenomic Analyses Reveal Genotype-Immunophenotype Relationships and Predictors of Response to Checkpoint Blockade. *Cell Rep* 18, 248-262. 10.1016/j.celrep.2016.12.019.
- S2. Robertson, A.G., Kim, J., Al-Ahmadie, H., Bellmunt, J., Guo, G., Cherniack, A.D., Hinoue, T., Laird, P.W., Hoadley, K.A., Akbani, R., et al. (2017). Comprehensive Molecular Characterization of Muscle-Invasive Bladder Cancer. *Cell*, 540-556. 10.1016/j.cell.2017.09.007.
- S3. Dunkler, D., Ploner, M., Schemper, M., and Heinze, G. (2018). Weighted Cox Regression Using the R Package coxphw. *J Statistical Software* 84. doi: 10.18637/jss.v084.i02.
- S4. Ayers, M., Lunceford, J., Nebozhyn, M., Murphy, E., Loboda, A., Kaufman, D.R., Albright, A., Cheng, J.D., Kang, S.P., Shankaran, V., et al. (2017). IFN-gamma-related mRNA profile predicts clinical response to PD-1 blockade. *J. Clin. Invest.* 127, 2930-2940. 10.1172/JCI91190.
- S5. Korpala, M., Puyang, X., Jeremy Wu, Z., Seiler, R., Furman, C., Oo, H.Z., Seiler, M., Irwin, S., Subramanian, V., Julie Joshi, J., et al. (2017). Evasion of immunosurveillance by genomic alterations of PPARgamma/RXRalpha in bladder cancer. *Nat Commun* 8, 103. 10.1038/s41467-017-00147-w.
- S6. Danaher, P., Warren, S., Dennis, L., D'Amico, L., White, A., Disis, M.L., Geller, M.A., Odunsi, K., Beechem, J., and Fling, S.P. (2017). Gene expression markers of Tumor Infiltrating Leukocytes. *Journal for immunotherapy of cancer* 5, 18. 10.1186/s40425-017-0215-8.
- S7. Hedegaard, J., Lamy, P., Nordentoft, I., Algaba, F., Hoyer, S., Ulhoi, B.P., Vang, S., Reinert, T., Hermann, G.G., Mogensen, K., et al. (2016). Comprehensive Transcriptional Analysis of Early-Stage Urothelial Carcinoma. *Cancer Cell* 30, 27-42. 10.1016/j.ccell.2016.05.004.
- S8. Sjobahl, G., Lauss, M., Lovgren, K., Chebil, G., Gudjonsson, S., Veerla, S., Patschan, O., Aine, M., Ferno, M., Ringner, M., et al. (2012). A molecular taxonomy for urothelial carcinoma. *Clin. Cancer Res.* 18, 3377-3386. 10.1158/1078-0432.CCR-12-0077-T.
